# Supplementary material
Source: Springer Nature journal article supplement (https://mijn.bsl.nl/resource/supplementary/13047_2013_569_MOESM1_ESM.pdf/7112424)
Supplement: MOESM1 [file 7112424]

A

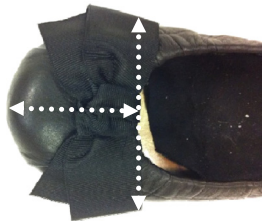

B

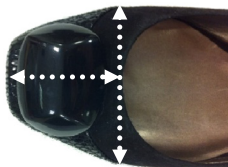

C

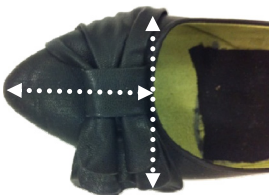

| Size | Toe box | Round | Square | Point |
|------|---------|-------|--------|-------|
|      |         | A     | B      | C     |
| 4    | Volume  | 36    | 47     | 44    |
|      | Width   | 7.4   | 7.6    | 7.5   |
|      | Depth   | 3.8   | 4.5    | 6.5   |
| 5    | Volume  | 45    | 55     | 60    |
|      | Width   | 7.6   | 8.0    | 7.7   |
|      | Depth   | 4.1   | 5.0    | 7.0   |
| 6    | Volume  | 50    | 60     | 60    |
|      | Width   | 7.9   | 8.2    | 8.0   |
|      | Depth   | 4.2   | 4.9    | 7.0   |
| 7    | Volume  | 54    | 73     | 68    |
|      | Width   | 8.3   | 8.5    | 8.2   |
|      | Depth   | 4.9   | 5.4    | 7.0   |
